# Supplementary material for: Technical Note: Disturbance of soil structure can lead to release of entrapped methane in glacier forefield soils
Source: Copernicus journal article supplement (doi:10.5194/bg-11-613-2014), 2014-02-04
Supplement: Supplementary file 1 [file bg-11-613-2014-supplement.pdf]

### Stepwise sampling with steel rod (SR)

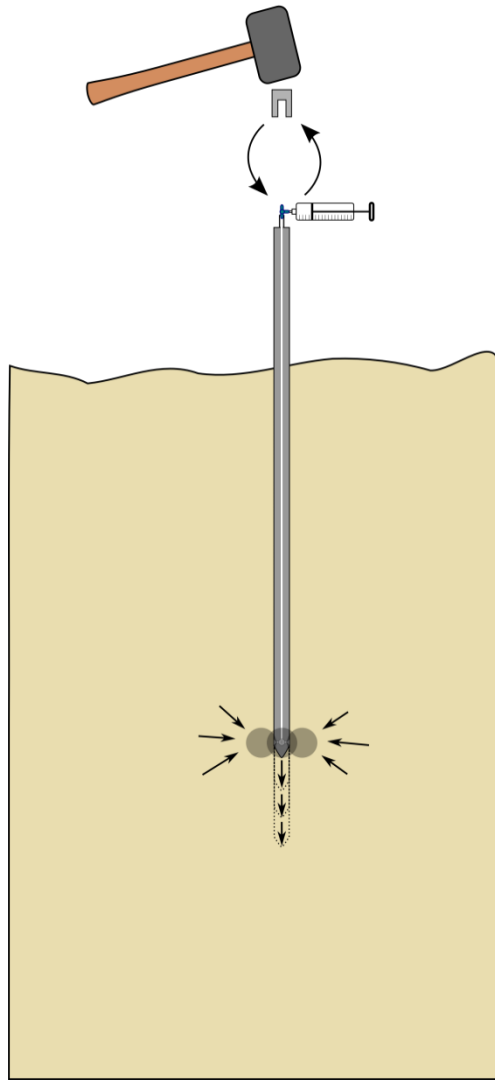

Fig. S1: Illustration of soil-gas sampling with the steel rod (SR). Samples are collected stepwise in user-defined depths; between sampling the rod is hammered further into the soil.

### Multi-level sampler (MLS)

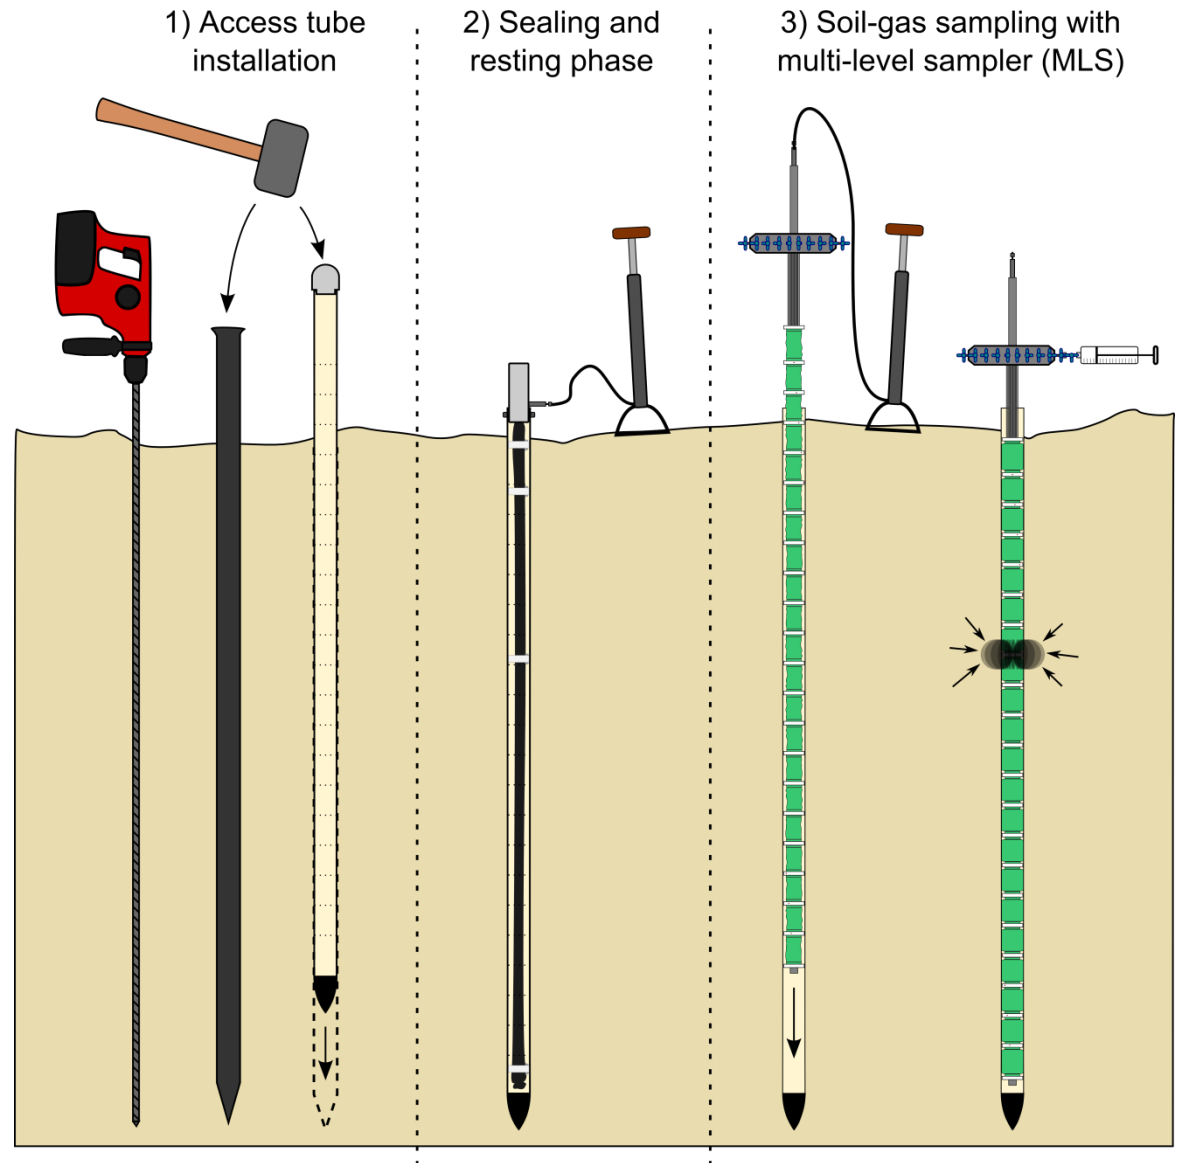

Fig. S2: Illustration of soil-gas sampling with the multi-level sampler (MLS). 1) Permanent installation of a perforated access tube. 2) Sealing of the tube from the inside to prevent undesired gas exchange; a resting phase allows consolidation of the soil. 3) Soil-gas samples are taken through the walls of the access tubes at 20 defined depths with a MLS featuring an inflatable packer system. Nauer et al., 2013.

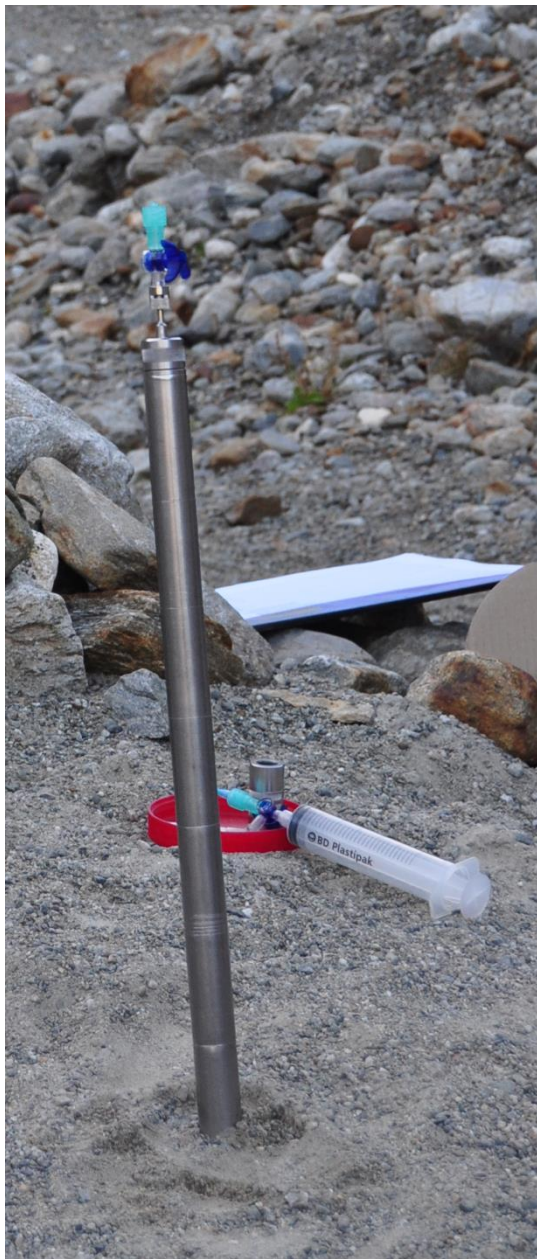

Fig. S3: Picture of the SR in use in a siliceous glacier forefield.

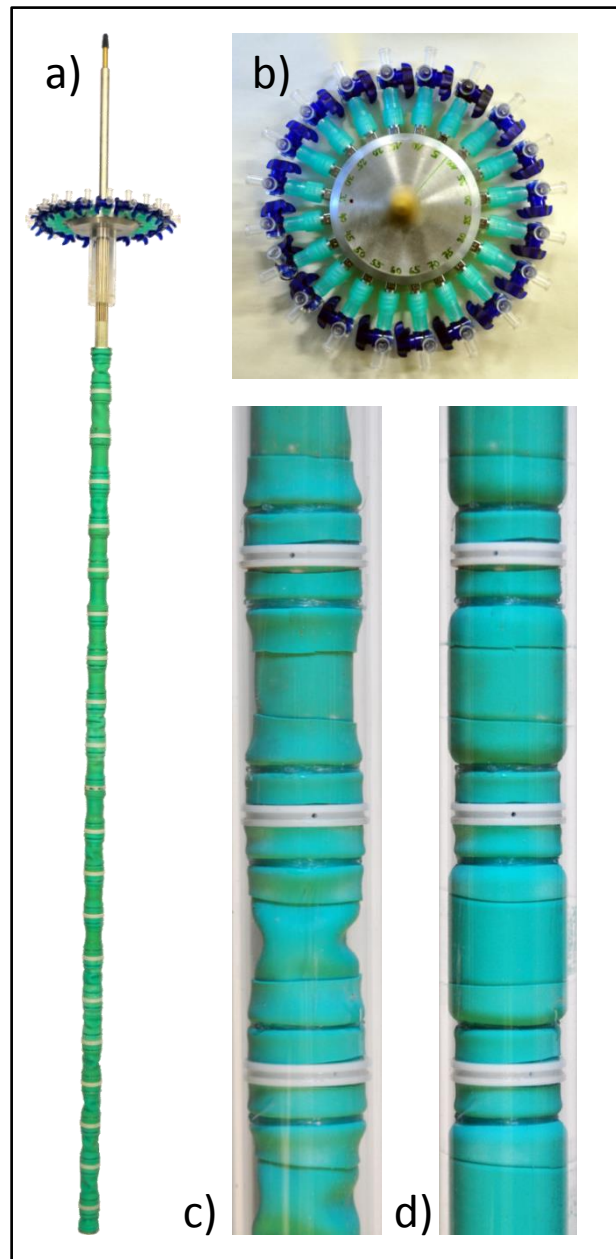

Fig. S4: Pictures of the MLS. a). Full-length picture. b) Top-down picture showing the 20 sampling valves. c) Close-up picture with c) deflated and d) inflated packer membranes in a transparent tube. Nauer et al., 2013.
